1 **Genomic and functional characterization of *Pseudomonas aeruginosa*-targeting**  
2 **bacteriophages isolated from hospital wastewater**

3

4 Hayley R. Nordstrom<sup>1</sup>, Daniel R. Evans<sup>1</sup>, Amanda G. Finney<sup>1</sup>, Kevin J. Westbrook<sup>1</sup>, Paula F.  
5 Zamora<sup>2</sup>, Alina Iovleva<sup>1</sup>, Mohamed H. Yassin<sup>1</sup>, Jennifer M. Bomberger<sup>2</sup>, Ryan K. Shields<sup>1</sup>, Yohei  
6 Doi<sup>1</sup>, Daria Van Tyne<sup>1,\*</sup>

7

8 <sup>1</sup>Division of Infectious Diseases, University of Pittsburgh School of Medicine

9 <sup>2</sup>Department of Microbiology and Molecular Genetics, University of Pittsburgh School of  
10 Medicine

11

12 \*Address correspondence to: [vantyne@pitt.edu](mailto:vantyne@pitt.edu)

13

14 Running head: Bacteriophages to target *Pseudomonas aeruginosa*

15

16 **Abstract**

17 *Pseudomonas aeruginosa* infections can be difficult to treat and new therapeutic approaches  
18 are needed. Bacteriophage therapy is a promising alternative to traditional antibiotics, but large  
19 numbers of isolated and characterized phages are lacking. We collected 23 genetically and  
20 phenotypically diverse *P. aeruginosa* isolates from people with cystic fibrosis (CF) and clinical  
21 infections, and characterized their genetic, phenotypic, and prophage diversity. We then used  
22 these isolates to screen and isolate 14 new *P. aeruginosa*-targeting phages from hospital  
23 wastewater. Phages were characterized with genome sequencing, comparative genomics, and  
24 lytic activity screening against all 23 bacterial host isolates. For four different phages, we  
25 evolved bacterial mutants that were resistant to phage infection. We then used genome  
26 sequencing and functional analysis of the resistant mutants to study their mechanisms of phage

27 resistance as well as changes in virulence factor production and antibiotic resistance, which  
28 differed from corresponding parent bacterial isolates. Finally, we tested two phages for their  
29 ability to kill *P. aeruginosa* grown in biofilms *in vitro*, and observed that both phages reduced  
30 viable bacteria in biofilms by least one order of magnitude. One of these phages also showed  
31 activity against *P. aeruginosa* biofilms grown on CF airway epithelial cells. Overall, this study  
32 demonstrates how systematic genomic and phenotypic characterization can be deployed to  
33 develop bacteriophages as precision antibiotics.

34

### 35 **Introduction**

36 The evolution of multidrug-resistant bacteria continues to outpace the development of new  
37 antimicrobials, posing a serious threat to public health. Rates of infection and mortality due to  
38 antibiotic-resistant pathogens are continuing to grow in the United States and around the world,  
39 despite efforts to curtail their spread (1, 2). Compounding the rise of multidrug-resistant bacterial  
40 infections, antibiotic development pipelines at many pharmaceutical companies have slowed or  
41 run dry (3). To help curtail this growing public health crisis, innovative approaches to  
42 antimicrobial therapy are needed.

43

44 *Pseudomonas aeruginosa* is a Gram-negative bacterium that causes a variety of infections,  
45 including bacteremia and pneumonia (4). *P. aeruginosa* chronically colonizes the airways of  
46 people with cystic fibrosis (CF), and is associated with increased morbidity and mortality in CF  
47 individuals (5). The *P. aeruginosa* species encompasses a wide breadth of genomic and  
48 phenotypic diversity, and multidrug-resistant strains often evolve during the course of prolonged  
49 antibiotic treatment (6). The success of *P. aeruginosa* as an opportunistic pathogen, its  
50 propensity for developing drug resistance, and the major threat it poses to CF patients, are  
51 compelling reasons to develop new and more effective therapies to treat *P. aeruginosa*  
52 infections.

53

54 Modern medicine is quickly approaching a “post-antibiotic” era, in which current antibiotics may  
55 no longer be effective treatments for bacterial infections due to the rampant spread of drug  
56 resistance (7). The urgent need for alternative therapies has prompted clinicians and scientists  
57 to reconsider the use of bacteriophage therapy (8), particularly for treating infections that cannot  
58 be resolved with antibiotics alone (9). Recent advances in genomics and genetic engineering  
59 have facilitated the development of phage-based therapies that have proven successful in  
60 clinical settings (9), including *P. aeruginosa* infections in CF (10). Here, we used a genetically  
61 diverse panel of 23 *P. aeruginosa* clinical isolates, collected mostly from CF patients, to isolate  
62 over a dozen distinct bacteriophages from hospital wastewater. We characterized the genomic  
63 and phenotypic diversity of the bacterial isolates and phages, including a subset of evolved  
64 phage-resistant bacterial mutants. We also tested the ability of some of the isolated phages to  
65 clear bacterial biofilms *in vitro* and *ex vivo*. These data can aid in the rational design of tailored,  
66 phage-based therapies for the treatment of *P. aeruginosa* infections.

67

## 68 **Materials and Methods**

### 69 **Bacterial isolate collection**

70 *P. aeruginosa* bacterial isolates were collected from patients treated at the University of  
71 Pittsburgh Medical Center (UPMC) (n=21), or were purchased from the American Type Culture  
72 Collection (ATCC) (n=2). Collection of UPMC isolates was conducted with Institutional Review  
73 Board Approval (protocol #PRO12060302). Of the UPMC isolates, 20 were collected from  
74 people with CF and one was a clinical isolate from sputum collected from a non-CF patient.  
75 Both ATCC isolates were of clinical origin. All isolates were cryopreserved in brain heart  
76 infusion (BHI) media with 16.7% glycerol and stored at -80°C.

77

### 78 **Hospital wastewater collection and processing**

79 Wastewater effluent was sampled from the main sewer outflow of a Pittsburgh area hospital, at  
80 a point before the outflow joined with the municipal sewer system. A total of four samples were  
81 collected over a six-month period. Each effluent sample was centrifuged at 4,000rpm for 20  
82 minutes to pellet solid debris, the supernatant was filtered through a 0.22- $\mu$ m filter, and the  
83 sample was then concentrated by centrifugation using an Amicon 100kDa filter unit  
84 (MilliporeSigma, Burlington, MA) at 4,000rpm for 15 minutes.

85

### 86 **Isolation of bacteriophages and phage-resistant mutants**

87 Lytic bacteriophages were identified with a soft agar overlay assay. Briefly, bottom agar plates  
88 were prepared containing BHI media with 1.5% agar, 1mM CaCl<sub>2</sub> and 1mM MgCl<sub>2</sub>. Bacterial  
89 isolates were inoculated into BHI media and grown overnight at 37°C. 100 $\mu$ L of bacterial culture  
90 was added to a tube containing 100 $\mu$ L of filtered concentrated wastewater for 5-10 minutes at  
91 room temperature, and then 10mL of top agarose (BHI with 0.5% agarose, 1mM CaCl<sub>2</sub>, and  
92 1mM MgCl<sub>2</sub>) cooled to 55°C was added and the mixture was plated onto two bottom agar  
93 plates. Plates were incubated overnight at 37°C and were examined the following day to identify  
94 lytic phage plaques. Phages were passaged by sequential picking and plating of individual  
95 plaques grown on the same bacterial isolate. Phages were picked from individual plaques using  
96 a pipette tip and were placed into 100 $\mu$ L of SM buffer (50mM Tris-HCl pH 7.5, 100mM NaCl,  
97 8mM MgSO<sub>4</sub>) and incubated overnight at 37°C. The following day, serial 10-fold dilutions were  
98 made in SM buffer, and 3 $\mu$ L of each dilution was spotted onto a plate containing 5mL of top  
99 agarose mixed with 50 $\mu$ L of bacterial culture and layered on top of a bottom agar plate. After  
100 overnight incubation at 37°C, an individual plaque was picked and passaged again. Each phage  
101 was passaged at least twice before the generation of high-titer stocks.

102

103 To generate high-titer stocks, a single plaque was picked into 100 $\mu$ L of SM buffer and incubated  
104 overnight. Then, 100 $\mu$ L of overnight bacterial culture was added and the mixture was incubated

105 for 5-10 minutes at room temperature, followed by addition of 10mL of top agarose and plating  
106 onto two bottom agar plates. Plates were incubated overnight at 37°C, and then plates with high  
107 plaque density were flooded with 5mL of SM buffer and incubated at 37°C for at least 1 hour to  
108 elute phages from the top agar. SM buffer was removed from each plate, pooled, spun down at  
109 4,000rpm for 20 minutes, and filtered through a 0.22µm filter. Phage-containing lysates were  
110 extracted with 0.1 volumes of chloroform followed by 0.4 volumes of 1-octanol, and were stored  
111 at 4°C.

112

113 When phage-resistant mutants were observed in the course of preparing high-titer phage  
114 lysates, they were saved for additional characterization. Individual bacterial colonies were  
115 picked, restreaked onto BHI agar, and tested by plaque assay to confirm their resistance to the  
116 isolated phage, as well by spotting onto a lawn of the parent bacterial isolate to confirm that they  
117 were not lysogens.

118

### 119 **Phenotypic characterization of bacterial hosts and phage-resistant mutants**

120 Biofilm assays were performed following a previously published protocol (11). Briefly, bacteria  
121 were first inoculated into LB media and incubated overnight at 37°C. Cultures were then diluted  
122 1:100 into M63 media. Diluted cultures were aliquoted into vinyl 96-well plates (100µl per well)  
123 sealed, and incubated at 37°C for 24 hours. After incubation, planktonic cells were removed by  
124 inverting the plates and shaking liquid out into a sterilization tub. Plates were then submerged in  
125 water and rinsed twice to remove unattached cells. Wells were stained with 0.1% crystal violet  
126 and incubated at room temperature for 15 minutes. Plates were rinsed three times with water  
127 and shaken out vigorously, then allowed to dry completely. Crystal violet stain was solubilized  
128 with 30% acetic acid. Absorbance was read in each well at 550nm using a BioTech Synergy H1  
129 microplate reader with GenMark software (BioTech, Winooski, VT). Two biological replicates,  
130 each containing 24 technical replicates, were run for each isolate. To test phage activity against

131 bacteria grown in biofilms, biofilms were inoculated into 96-well plates as above and incubated  
132 for 24 hours at 37°C. Planktonic cells were removed and biofilms were washed with sterile  
133 1xPBS using a multichannel pipettor, and either fresh M63 media or phage at  $1 \times 10^{12}$  PFU/mL in  
134 M63 media was added to each well. Plates were incubated for 24 hours at 37°C, then bacteria  
135 in each well were resuspended and serial 10-fold dilutions were tracked onto BHI agar plates to  
136 determine the number of colony-forming units per mL (CFU/mL) in each condition.

137

138 Extracellular protease production was measured by spotting 2.5µL of an overnight culture of  
139 each isolate grown in BHI media onto a BHI agar plate containing 10% milk. Plates were  
140 incubated overnight at 30°C and read the following day. Protease activity was detected as a  
141 clear halo surrounding the bacterial spot. Swimming motility was measured by spotting 2.5µL  
142 from an overnight bacterial culture grown in BHI media onto plates containing LB + 0.3% agar.  
143 Plates were incubated overnight at 37°C and read the following day. Swimming motility was  
144 detected as bacterial growth away from the central spot. Twitching motility was assessed by  
145 inserting a pipet tip coated in overnight bacterial culture completely through a BHI agar plate to  
146 create a small hole in the agar, and then incubating for 48 hours at 37°C. Mucoidity was  
147 measured by assessing the morphology of each isolate when grown on both LB agar and  
148 *Pseudomonas* isolation agar (PIA) plates. Each isolate was struck onto each agar type, then  
149 incubated at 37°C overnight, followed by a 48-hour incubation at room temperature.

150

151 Antibiotic susceptibility testing was performed by broth microdilution in Mueller-Hinton Broth  
152 according to the standard protocol established by the Clinical Laboratory Standards Institute  
153 (CLSI) (12). Serial two-fold dilutions of ceftazidime were tested and the minimum inhibitory  
154 concentration (MIC) was recorded as the lowest antibiotic concentration that inhibited bacterial  
155 growth by visual inspection. Pyoverdine production was measured by first growing isolates to  
156 stationary phase in LB media and then inoculating bacteria into M9 media supplemented with

157 20mM sodium succinate and 0.5% iron-depleted casamino acids (produced by pre-treating a  
158 10% stock solution with 0.05g/mL Chelex-100 for one hour). Bacteria were grown overnight,  
159 then pyoverdine fluorescence was measured at excitation=400nm and emission=447nm  
160 wavelengths on a BioTech Synergy H1 microplate reader with GenMark software (BioTech,  
161 Winooski, VT). Raw fluorescence unit values were collected, background fluorescence was  
162 subtracted, and fluorescence units were normalized by OD<sub>600</sub>. Three biological replicates, each  
163 consisting of four technical replicates, were tested.

164

### 165 **Genome sequencing and analysis**

166 Bacterial genomic DNA was extracted from 1mL overnight cultures grown in BHI media using a  
167 Qiagen DNeasy Blood and Tissue Kit (Qiagen, Germantown, MD) following the manufacturer's  
168 protocol. Illumina sequencing libraries were prepared with a Nextera XT or Nextera kit (Illumina,  
169 San Diego, CA), and libraries were sequenced on a MiSeq using 300-bp paired-end reads, or  
170 on a NextSeq using 150-bp paired-end reads. Genomic DNA was also used to construct long-  
171 read sequencing libraries using a rapid barcoding kit (SQK-RBK004, Oxford Nanopore  
172 Technologies, Oxford, UK), and libraries were sequenced on a MinION device. Base-calling of  
173 nanopore reads was performed with Guppy. Genomes were hybrid assembled with unicycler  
174 (13), annotated with prokka (14), and were compared to one another with Roary (15). A core  
175 genome phylogenetic tree was generated using RAxML with the GTRCAT substitution model  
176 and 1000 iterations (16). Prophages were identified in each bacterial genome using PHASTER  
177 (17). Prophages of any length that were predicted to be intact or questionable by PHASTER  
178 were included. Prophage sequences were compared to one another with nucleotide BLAST,  
179 and clusters of similar prophage sequences were identified as those sharing >90% sequence  
180 coverage and >90% sequence identity.

181

182 Phage genomic DNA was extracted from 500 $\mu$ L of phage lysate using phenol chloroform,  
183 followed by ethanol precipitation. Briefly, 500 $\mu$ L phenol:chloroform:isoamyl alcohol (25:24:1)  
184 was added to each lysate, samples were vortexed and then centrifuged at 16,000 x *g* for 1  
185 minute. The upper aqueous phase was transferred to a new tube and 500 $\mu$ L of chloroform was  
186 added. Samples were vortexed and centrifuged again at 16,000 x *g* for 1 minute, and the upper  
187 aqueous phase was again transferred to a new tube. Then 1 $\mu$ L glycogen, 0.1x volume 3M  
188 sodium acetate, and 2.5x volume 100% ethanol were added and samples were incubated  
189 overnight at -20°C. The next day samples were centrifuged at 16,000 x *g* for 30 minutes at 4°C,  
190 then the supernatant was removed and the DNA pellet was washed with 150 $\mu$ L 70% ethanol.  
191 DNA pellets were resuspended in 100 $\mu$ L nuclease-free water, and DNA was quantified with a  
192 Qubit fluorimeter (Thermo Fisher Scientific, Waltham, MA). Illumina sequencing libraries were  
193 prepared with a Nextera XT or Nextera kit (Illumina, San Diego, CA), and libraries were  
194 sequenced on a MiSeq using 300-bp paired-end reads, or on a NextSeq using 150-bp paired-  
195 end reads. Phage genomes were assembled with SPAdes v3.13.0 (18), and were annotated  
196 with prokka (14). Phage genomes were compared to one another and to other available phage  
197 genomes using BLAST (19), PHASTER (17), and Mauve (20).

198

### 199 ***Ex vivo* biofilm assay**

200 Immortalized human bronchial epithelial cells isolated from a  $\Delta$ F508/ $\Delta$ F508 CF patient  
201 (CFBE41o- cells) (21) were cultured on Transwell inserts (Corning, Corning, NY) and grown for  
202 7-10 days at the air-liquid interface, as described (22). Basolateral medium was replaced with  
203 minimum essential medium (MEM) supplemented with 2mM L-glutamine 24h before bacterial  
204 inoculation. *P. aeruginosa* isolate 427 was inoculated into the apical compartment as described  
205 previously (23), with the following modifications: bacteria were inoculated at a multiplicity of  
206 infection of 0.015 CFU/cell in MEM and were incubated at 37°C for 1h, followed by inoculum  
207 removal and addition of MEM supplemented with 2mM L-glutamine and 23mM L-arginine. *P.*



208 *aeruginosa* phage PSA07/PB1 was added to the apical compartment 8h post-bacterial  
209 inoculation at a concentration of  $8 \times 10^6$  PFUs/mL and incubated at 37°C for 16h. Following  
210 washing of the apical and basolateral media, biofilms were collected by adding 0.1% Triton X-  
211 100 apically and centrifuged to remove soluble phages. CFUs were quantified by dilution  
212 plating onto LB agar.

213

## 214 **Statistical Analyses**

215 Two-tailed *t*-tests were used to assess the significance of prophage differences between  
216 CRISPR+ and CRISPR- isolates, differences in pyoverdine production between parent and  
217 phage-resistant mutant isolates, and differences in bacterial cell density in biofilm killing  
218 experiments.

219

## 220 **Data Availability**

221 Hybrid assembled bacterial host genomes were submitted to NCBI under BioProject  
222 PRJNA610040. Bacteriophage genomes were submitted to NCBI under BioProject  
223 PRJNA721956.

224

## 225 **Results**

### 226 ***P. aeruginosa* clinical isolates used for phage screening are genetically and** 227 **phenotypically diverse**

228 To isolate bacteriophages that could be maximally useful for the treatment of *P. aeruginosa*  
229 infections, we assembled a genetically and phenotypically diverse panel of 23 *P. aeruginosa*  
230 isolates collected from clinical sources (Table S1). Two isolates were purchased from the  
231 American Type Culture Collection (ATCC), 20 isolates were collected from adults with cystic  
232 fibrosis (CF), and one isolate was collected from the sputum of a hospitalized non-CF patient.  
233 All isolates were collected from different patients. The genome of each isolate was sequenced

234 on both the Illumina and Oxford Nanopore MinION platforms, and the resulting sequencing data  
235 were hybrid assembled (13). Over half (14/23) of the genomes were closed to a single  
236 chromosome, and the remaining nine assemblies all contained 10 or fewer contigs (Table S1).  
237 Among the 23 isolates, a total of 19 different multi-locus sequence types (STs) were identified  
238 (Table S1). A core genome phylogeny of all 23 isolates confirmed that they were highly  
239 genetically diverse (Fig. 1A). All isolates were tested for their ability to form biofilms, produce  
240 extracellular protease, exhibit swimming motility, and display a mucoid phenotype when grown  
241 on LB and *Pseudomonas* isolation agars. These phenotypes were found to be variable among  
242 the collected isolates (Fig. 1A), demonstrating that the assembled isolate panel was both  
243 genetically and phenotypically diverse.

244

245 We assessed the abundance and diversity of prophage sequences in the 23 *P. aeruginosa*  
246 clinical isolates we collected. The genome of each isolate was mined for prophage sequences  
247 using the PHASTER online tool (17). Between 0 and 6 prophages were found in each isolate  
248 genome (Fig. 1A, Table S2). Prophages varied in length from 5.5-74.5 Kb and in GC-content  
249 from 52.5%-66.0%. A total of 54 prophage sequences were extracted, and were compared to  
250 one another using nucleotide BLAST to assess both the nucleotide identity and coverage across  
251 all pairwise comparisons (Fig. 1B). A total of six different prophages were found to be present in  
252 more than one isolate; these included three distinct phiCTX-like phages and two Pf1-like  
253 filamentous phages. Finally, we assessed the number of prophages in isolates that were  
254 predicted to have either functional or non-functional Clustered Regularly Interspaced Short  
255 Palindromic Repeats (CRISPR) loci, based on the presence or absence of Cas enzymes in the  
256 genome of each isolate (Table S1). We found that the seven isolates predicted to have non-  
257 functional CRISPR-Cas systems had more prophages compared to isolates with intact CRISPR-  
258 Cas loci (Fig. 1C,  $P=0.03$ ).

259

260 ***P. aeruginosa*-targeting bacteriophages isolated from hospital wastewater**

261 We used the 23 *P. aeruginosa* isolates we collected to screen for lytic bacteriophages in  
262 wastewater effluent collected from a Pittsburgh area hospital. A total of 14 phages were isolated  
263 on 10 different *P. aeruginosa* isolates (Table 1). One additional phage, PB1, was purchased  
264 from ATCC and was propagated and characterized alongside the newly isolated phages.  
265 Because sequencing the genome of this phage revealed multiple mutations when compared to  
266 the PB1 sequence deposited in NCBI, we refer to it here as PSA07/PB1. Phages were picked  
267 and repeatedly passaged as single plaques, and were then amplified to generate high-titer  
268 stocks. Genomic DNA was extracted from each phage stock, and was sequenced on the  
269 Illumina platform. Phage genomes were found to be between 43.7-65.9 Kb in length and had  
270 GC-content ranging from 44.9%-64.5% (Table 1). Phages were compared to publicly available  
271 genomes using PHASTER and NCBI BLAST, and the predicted family and genus of each  
272 phage were determined based on similarity to previously described phages. Despite appearing  
273 to be lytic on the isolates used to propagate them, three phages (PSA04, PSA20, and PSA21)  
274 were predicted to have a lysogenic lifestyle due to the presence of annotated phage integrases.  
275 The PSA04 genome was most similar to the JBD44 lysogenic phage (24), however the  
276 homology between these two phages was not particularly high (Table 1). The PSA20 and  
277 PSA21 phage genomes showed moderate sequence similarity to the *Yuavirus* phages AN14  
278 and LKO4, in which the putative integrase is instead believed to be a DNA primase (25). The  
279 lack of previously described lysogenic activity among *Yuavirus* phages is consistent with our  
280 observations of lytic behavior for phages PSA04, PSA20 and PSA21.

281  
282 Next, we compared the genomes of the isolated phages to one another, and to the publicly  
283 available phage genomes that were most similar to them, using nucleotide BLAST (Table 1, Fig.  
284 2). Phages within the same genus showed varying degrees of genomic similarity with one  
285 another, and no similarity was observed across different families or genera. Six of the phages

286 we isolated belonged to the *Bruynoghevirus* genus within the *Podoviridae* family; three of these  
287 phages (PSA31, PSA37, and PSA40) were highly similar to one another, despite having been  
288 isolated on three different *P. aeruginosa* isolates and from three different wastewater samples  
289 (Fig. S1). These data suggest that *Bruynoghevirus* phages might have been particularly  
290 abundant in the wastewater that we sampled, and that they are able to infect genetically diverse  
291 *P. aeruginosa* isolates.

292

### 293 **Phage susceptibility of *P. aeruginosa* isolates and bacteriophage infectivity**

294 To examine the phage susceptibilities of our *P. aeruginosa* isolates as well as the infectivity  
295 profile of each phage, we performed a lytic activity screen of the 15 bacteriophages studied here  
296 against all 23 bacterial isolates (Fig. 3). Serial dilutions of each phage were spotted onto top  
297 agar lawns of each bacterial isolate, and individual plaques were counted to determine the titer  
298 of each phage against each isolate. Three of the *P. aeruginosa* isolates we tested (413, 414,  
299 and 729) were resistant to all phages tested, however the other 20 isolates (87% of all isolates  
300 tested) were susceptible to multiple phages belonging to different families (Fig. 3). Phage  
301 susceptibility profiles of the isolates were highly variable, with the exception of isolate pairs  
302 418/423 and 427/466; these pairs contained isolates belonging to the same ST, which were  
303 more genetically similar to one another than to the other isolates in the study. While phages  
304 were found to infect between 9 and 19 different isolates, activity of the same phage was often  
305 variable against different isolates. For example, phage PSA07/PB1 displayed titers varying from  
306  $10^2$  to  $10^{10}$  PFU/mL against different *P. aeruginosa* isolates (Fig. 3). Finally, compared to  
307 *Myoviridae* and *Siphoviridae* phages, the *Podoviridae* phages we isolated were able to infect  
308 more isolates and had higher average infectivity against the isolates tested here.

309

### 310 **Genomic and phenotypic differences of phage-resistant mutants**

311 During the course of phage propagation, we isolated single colonies of phage-resistant mutants  
312 for four phages: PSA09, PSA11, PSA20, and PSA34 (Fig. 4). Phage-resistant mutant isolates  
313 were tested to confirm their resistance, and were then subjected to whole-genome sequencing.  
314 Sequencing reads were mapped to the hybrid assembled genome of the corresponding phage-  
315 susceptible parent isolate, and protein-altering mutations in each resistant mutant were  
316 identified (Table 2). Each phage-resistant mutant genome encoded 2-3 protein-altering  
317 mutations. Based on the annotation of each mutated gene, we were able to identify putative  
318 phage resistance-conferring mutations in each mutant isolate genome. A phage-resistant  
319 mutant in the 639 isolate background that was resistant to phage PSA20 was found to have a  
320 Thr278Pro mutation in the Type IV pilus protein PilB (Table 2). Because Type IV pili are  
321 involved in twitching motility, we compared the twitching motility of the 639 *P. aeruginosa* parent  
322 isolate and the PSA20-resistant mutant, and found that the resistant mutant showed diminished  
323 twitching motility (Fig. 4A). Two other phage-resistant mutants raised in different *P. aeruginosa*  
324 parent isolates against different phages both encoded mutations in genes predicted to impact  
325 LPS biosynthesis, including a RfaB-like glycosyltransferase and the dTDP-4-dehydrorhamnose  
326 reductase RfbD (Table 2). We compared the susceptibilities of both phage-resistant mutants  
327 and their corresponding parent isolates to ceftazidime, an antibiotic that is used to treat *P.*  
328 *aeruginosa* infections (26). The mutants showed either four-fold or eight-fold sensitization to  
329 ceftazidime compared to their parents (Fig. 4B), indicating that the phage resistance-conferring  
330 alterations to the LPS in these mutants also increased their susceptibility to a cell wall-targeting  
331 antibiotic. A final mutant was found to carry a frameshift mutation that disrupted the coding  
332 sequence of the quorum-sensing master regulator LasR (Table 2). Because LasR is known to  
333 regulate the production of *P. aeruginosa* virulence factors, we measured the production of  
334 extracellular protease and pyoverdine in both the parent and phage-resistant mutant isolates  
335 (Fig. 4C and D). Extracellular protease production was absent and pyoverdine production was  
336 greatly diminished in the phage-resistant mutant compared to the parent isolate. Overall these

337 data demonstrate the variability of genetic mechanisms underlying phage resistance, as well as  
338 the collateral phenotypic effects of resistance.

339

#### 340 **Phage-mediated killing of bacterial biofilms *in vitro* and *ex vivo***

341 Because *P. aeruginosa* causing infections frequently grows in biofilms (27), we tested whether  
342 phages that were active against bacteria in our top agar lawn-based activity assays could also  
343 kill bacteria grown in biofilms (Fig. 5). We first tested the ability of the PSA07/PB1 and PSA34  
344 phages to kill the 427 *P. aeruginosa* isolate grown in biofilms *in vitro*. Biofilms were grown for 24  
345 hours, planktonic cells were removed and biofilms were washed, and then phages were applied  
346 and plates were incubated for an additional 24 hours. PSA07/PB1 treatment resulted in >100-  
347 fold bacterial killing, and PSA34 treatment resulted in >10-fold bacterial killing (Fig. 5A). Next,  
348 we tested the ability of the PSA07/PB1 phage to kill the 427 isolate grown in biofilms in  
349 association with human CF airway epithelial cells. Bacteria were incubated with epithelial cells  
350 for 8 hours, then phage was added and incubated for additional 16 hours before cell-associated  
351 bacteria were collected and quantified for viability. We found that similar to the *in vitro* assay,  
352 PSA07/PB1 treatment resulted in >100-fold bacterial killing (Fig. 5B), suggesting that phages  
353 can also kill *P. aeruginosa* grown in biofilms under conditions that more closely mimic infection  
354 in humans.

355

#### 356 **Discussion**

357 The objective of this study was to isolate and characterize lytic bacteriophages from hospital  
358 wastewater with activity against clinically relevant *P. aeruginosa* isolates. By screening  
359 wastewater samples against a genetically and phenotypically diverse panel of *P. aeruginosa*  
360 bacterial isolates, we were able to isolate a diverse group of *P. aeruginosa*-targeting phages  
361 representing three families: *Myoviridae*, *Siphoviridae* and *Podoviridae*. In testing our panel of *P.*  
362 *aeruginosa* isolates for susceptibility to the isolated phages, we found a broad range of phage

363 activities. Additionally, our analysis of select phage-resistant mutants showed that evolving  
364 phage resistance often conferred an increase in antibiotic susceptibility or a reduction in  
365 bacterial virulence. Finally, two of the phages we isolated were able to kill *P. aeruginosa* grown  
366 in biofilms *in vitro* and *ex vivo*, suggesting that they have therapeutic utility for the treatment of  
367 *P. aeruginosa* infections.

368  
369 The bacteriophages we isolated in this study were similar in terms of phage family, genus, and  
370 other genome characteristics to *P. aeruginosa*-targeting phages isolated previously (28-31).  
371 This could be due to the fact that these prior studies also isolated phages from sewage, similar  
372 to what we did in this study. Our findings, however, are in keeping with the idea that phages  
373 active against *P. aeruginosa* mirror the abundant genetic and phenotypic diversity of their hosts.  
374 While it has been noted that newly isolated phages do not often represent novel phylogenetic  
375 lineages (30), sampling and screening from more diverse sources could potentially uncover a  
376 broader range of phage genetic diversity.

377  
378 While the vast majority of *P. aeruginosa* isolates we screened were susceptible to one or more  
379 of the phages we isolated, three bacterial isolates were resistant to all phages studied here.  
380 These three isolates (413, 414, and 729) were genetically distinct from one another, and no  
381 clear trends emerged to explain their resistance to phage infection. For example, they did not all  
382 have functional CRISPR-Cas systems or a higher relative abundance of prophages compared  
383 to phage-susceptible isolates. We did note that the *P. aeruginosa* 729 isolate grew very poorly,  
384 and was predicted to be a hypermutator due to a frameshift mutation in the DNA mismatch  
385 repair gene *mutS*. It is unknown whether hypermutators in *P. aeruginosa* are more resistant to  
386 phage infection; this would be a worthwhile avenue of future investigation. Nonetheless, the  
387 specific mechanism(s) conferring phage resistance in the clinical isolates we studied here  
388 remain unclear.

389

390 During the course of phage propagation, we isolated four phage-resistant *P. aeruginosa*  
391 mutants and studied them further. From whole-genome sequencing of these mutants, we  
392 identified three kinds of mutations that lead to measurable phenotypic changes. First, in the  
393 phage-resistant mutant of isolate 639, disruption of the Type IV pilus protein PilB appears to  
394 have also caused a reduction in twitching motility. Because the Type IV pilus has been  
395 previously described as a surface receptor used by *P. aeruginosa* phages for infection (32), we  
396 suspect that the phage PSA20, and also perhaps the other *Yuavirus* phages we isolated, use  
397 the Type IV pilus as a receptor for infection. Second, we identified mutations in genes affecting  
398 LPS biosynthesis in phage-resistant mutants of isolates 410 and 427. Bacterial LPS is also a  
399 well-known surface receptor used for phage infection in *P. aeruginosa* (33). Notably, we  
400 observed that the resulting phage-resistant mutants showed increased susceptibility to  
401 ceftazidime, a cell-wall targeting antibiotic. Finally, in the phage-resistant mutant of ATCC  
402 14210, a disruption in the quorum-sensing master regulator LasR resulted in a decrease in the  
403 production of extracellular protease as well as pyoverdine, which are two prominent virulence  
404 factors in *P. aeruginosa* (34). Taken together, these findings are consistent with the notion that  
405 the development of phage resistance is often coupled with collateral effects like decreased  
406 bacterial virulence or increased antibiotic susceptibility (35). This has potentially promising  
407 implications for treatment of *P. aeruginosa* infections using phages, where a tradeoff between  
408 phage resistance and antibacterial resistance could be exploited.

409

410 When we tested whether two different *P. aeruginosa* phages could kill bacteria grown in  
411 biofilms, we observed reductions in viable bacteria upon phage treatment of biofilms both *in*  
412 *vitro* and *ex vivo*. While application of phage did not completely eradicate bacteria growing in  
413 the biofilms, it did substantially decrease the bacterial loads measured in both assays to similar  
414 levels to the ones obtained after antibiotic treatment (36). This finding is consistent with other



415 studies that have also documented phage-mediated reductions in *P. aeruginosa* biofilm density  
416 *in vitro* (31, 37, 38). Here we have extended these *in vitro* findings to test the ability of phages to  
417 infect bacteria grown on human CF airway epithelial cells, a setting that more closely mimics  
418 bacterial growth in the CF airway (39, 40). Testing of phage efficacy in a context that includes  
419 eukaryotic cells is an important feature of this study. Whether and how bacteriophages interact  
420 with eukaryotic cells, and how this interaction may impact phage activity, is a focus on ongoing  
421 work by us and others (41).

422

423 This study had several limitations. Many of the phages we isolated showed variable activity, and  
424 their activity was generally diminished against isolates other than the host isolate used for their  
425 initial isolation and propagation. While we attempted to be unbiased in our phage isolation  
426 methods, we observed some redundancy in isolated phages within the *Podoviridae* family,  
427 suggesting a possible enrichment of our wastewater source with *Podoviridae* phages.  
428 Additionally, we only isolated and studied four different phage-resistant mutants, and we did not  
429 confirm that any of the resistance-associated mutations identified were indeed the cause of  
430 phage resistance, for example through genetic complementation. Finally, all work performed in  
431 this study was conducted *in vitro* or *ex vivo*, thus we are unable to conclude that any of the  
432 phages we isolated would be useful therapeutic candidates without additional testing, for  
433 example in relevant animal models of *P. aeruginosa* infection.

434

435 Taken together, the genotypic and phenotypic data presented here have promising implications  
436 for the therapeutic potential of *P. aeruginosa*-targeting bacteriophages. This study provides a  
437 valuable addition to the growing literature documenting the abundance and diversity of *P.*  
438 *aeruginosa* phages, and demonstrates how systematic characterization can aid in the  
439 development of phages for clinical use as precision antibiotics.

440

## 441 **Acknowledgements**

442 We gratefully acknowledge all members of the Van Tyne lab, and in particular Shu-Ting Cho for  
443 helpful input during the preparation of this manuscript. We also thank Carlos Guerrero-  
444 Bustamante and Catherine Armbruster for helpful contributions to the study. Research reported  
445 in this publication was supported in part by the National Institute of Allergy and Infectious  
446 Diseases of the National Institutes of Health under Award Number UM1AI104681. The content  
447 is solely the responsibility of the authors and does not necessarily represent the official views of  
448 the National Institutes of Health. This work was also supported by grants BOMBER19R0,  
449 BOMBER21P0, and ZAMORA20F0 from the Cystic Fibrosis Foundation, and by the Department  
450 of Medicine at the University of Pittsburgh School of Medicine. The funders had no role in study  
451 design, data collection and analysis, decision to publish, or preparation of the manuscript.

452

## 453 **Conflicts of Interest**

454 J.B. is a consultant for BiomX, Inc. The other authors have no relevant conflicts of interest.

455

## 456 **References**

- 457 1. CDC. 2019. Antibiotic Resistance Threats in the United States, 2019  
458 doi:<http://dx.doi.org/10.15620/cdc:82532>. U.S. Department of Health and Human  
459 Services, Atlanta, GA.
- 460 2. Friedman ND, Temkin E, Carmeli Y. 2016. The negative impact of antibiotic resistance.  
461 Clin Microbiol Infect 22:416-22.
- 462 3. Singer AC, Kirchhelle C, Roberts AP. 2019. Reinventing the antimicrobial pipeline in  
463 response to the global crisis of antimicrobial-resistant infections. F1000Res 8:238.
- 464 4. Moradali MF, Ghods S, Rehm BH. 2017. Pseudomonas aeruginosa Lifestyle: A  
465 Paradigm for Adaptation, Survival, and Persistence. Front Cell Infect Microbiol 7:39.
- 466 5. Høiby N, Ciofu O, Bjarnsholt T. 2010. Pseudomonas aeruginosa biofilms in cystic  
467 fibrosis. Future Microbiol 5:1663-74.
- 468 6. Winstanley C, O'Brien S, Brockhurst MA. 2016. Pseudomonas aeruginosa Evolutionary  
469 Adaptation and Diversification in Cystic Fibrosis Chronic Lung Infections. Trends  
470 Microbiol 24:327-337.
- 471 7. Alanis AJ. 2005. Resistance to antibiotics: are we in the post-antibiotic era? Arch Med  
472 Res 36:697-705.

- 473 8. Domingo-Calap P, Delgado-Martinez J. 2018. Bacteriophages: Protagonists of a Post-  
474 Antibiotic Era. *Antibiotics* (Basel) 7.
- 475 9. Schooley RT, Biswas B, Gill JJ, Hernandez-Morales A, Lancaster J, Lessor L, Barr JJ,  
476 Reed SL, Rohwer F, Benler S, Segall AM, Taplitz R, Smith DM, Kerr K, Kumaraswamy  
477 M, Nizet V, Lin L, McCauley MD, Strathdee SA, Benson CA, Pope RK, Leroux BM, Picel  
478 AC, Mateczun AJ, Cilwa KE, Regeimbal JM, Estrella LA, Wolfe DM, Henry MS,  
479 Quinones J, Salka S, Bishop-Lilly KA, Young R, Hamilton T. 2017. Development and  
480 Use of Personalized Bacteriophage-Based Therapeutic Cocktails To Treat a Patient with  
481 a Disseminated Resistant *Acinetobacter baumannii* Infection. *Antimicrob Agents*  
482 *Chemother* 61.
- 483 10. Trend S, Fonceca AM, Ditcham WG, Kicic A, Cf A. 2017. The potential of phage therapy  
484 in cystic fibrosis: Essential human-bacterial-phage interactions and delivery  
485 considerations for use in *Pseudomonas aeruginosa*-infected airways. *J Cyst Fibros*  
486 16:663-670.
- 487 11. O'Toole GA. 2011. Microtiter dish biofilm formation assay. *Journal of visualized*  
488 *experiments* : JoVE doi:10.3791/2437:2437.
- 489 12. CLSI. 2019. Performance Standards for Antimicrobial Susceptibility Testing, 29th ed.  
490 CLSI Supplement M100. Clinical and Laboratory Standards Institute.
- 491 13. Wick RR, Judd LM, Gorrie CL, Holt KE. 2017. Unicycler: Resolving bacterial genome  
492 assemblies from short and long sequencing reads. *PLoS Comput Biol* 13:e1005595.
- 493 14. Seemann T. 2014. Prokka: rapid prokaryotic genome annotation. *Bioinformatics*  
494 30:2068-9.
- 495 15. Page AJ, Cummins CA, Hunt M, Wong VK, Reuter S, Holden MT, Fookes M, Falush D,  
496 Keane JA, Parkhill J. 2015. Roary: rapid large-scale prokaryote pan genome analysis.  
497 *Bioinformatics* 31:3691-3.
- 498 16. Stamatakis A. 2014. RAxML version 8: a tool for phylogenetic analysis and post-analysis  
499 of large phylogenies. *Bioinformatics* 30:1312-1313.
- 500 17. Arndt D, Grant JR, Marcu A, Sajed T, Pon A, Liang Y, Wishart DS. 2016. PHASTER: a  
501 better, faster version of the PHAST phage search tool. *Nucleic Acids Res* 44:W16-21.
- 502 18. Bankevich A, Nurk S, Antipov D, Gurevich AA, Dvorkin M, Kulikov AS, Lesin VM,  
503 Nikolenko SI, Pham S, Prjibelski AD, Pyshkin AV, Sirotkin AV, Vyahhi N, Tesler G,  
504 Alekseyev MA, Pevzner PA. 2012. SPAdes: a new genome assembly algorithm and its  
505 applications to single-cell sequencing. *J Comput Biol* 19:455-77.
- 506 19. Altschul SF, Gish W, Miller W, Myers EW, Lipman DJ. 1990. Basic local alignment  
507 search tool. *J Mol Biol* 215:403-10.
- 508 20. Darling AC, Mau B, Blattner FR, Perna NT. 2004. Mauve: multiple alignment of  
509 conserved genomic sequence with rearrangements. *Genome Res* 14:1394-403.
- 510 21. Bruscia E, Sangiuolo F, Sinibaldi P, Goncz KK, Novelli G, Gruenert DC. 2002. Isolation  
511 of CF cell lines corrected at DeltaF508-CFTR locus by SFHR-mediated targeting. *Gene*  
512 *Ther* 9:683-5.
- 513 22. Hendricks MR, Lane S, Melvin JA, Ouyang Y, Stolz DB, Williams JV, Sadovsky Y,  
514 Bomberger JM. 2021. Extracellular vesicles promote transkingdom nutrient transfer  
515 during viral-bacterial co-infection. *Cell Rep* 34:108672.
- 516 23. Zemke AC, Shiva S, Burns JL, Moskowitz SM, Pilewski JM, Gladwin MT, Bomberger  
517 JM. 2014. Nitrite modulates bacterial antibiotic susceptibility and biofilm formation in  
518 association with airway epithelial cells. *Free Radic Biol Med* 77:307-16.
- 519 24. Bondy-Denomy J, Qian J, Westra ER, Buckling A, Guttman DS, Davidson AR, Maxwell  
520 KL. 2016. Prophages mediate defense against phage infection through diverse  
521 mechanisms. *The ISME Journal* 10:2854-2866.

- 522 25. Evseev PVG, A. S.; Sykilinda, N. N.; Drucker, V. V.; Miroshnikov, K. A. 2020.  
523 *Pseudomonas* bacteriophage AN14 – a Baikal-borne representative of *Yuavirus*.  
524 *Limnology and Freshwater Biology* 5:1055-1066.
- 525 26. Nguyen L, Garcia J, Gruenberg K, MacDougall C. 2018. Multidrug-Resistant  
526 *Pseudomonas* Infections: Hard to Treat, But Hope on the Horizon? *Curr Infect Dis Rep*  
527 20:23.
- 528 27. Maurice NM, Bedi B, Sadikot RT. 2018. *Pseudomonas aeruginosa* Biofilms: Host  
529 Response and Clinical Implications in Lung Infections. *Am J Respir Cell Mol Biol* 58:428-  
530 439.
- 531 28. Farlow J, Freyberger HR, He Y, Ward AM, Rutvisuttinunt W, Li T, Campbell R, Jacobs  
532 AC, Nikolich MP, Filippov AA. 2020. Complete Genome Sequences of 10 Phages Lytic  
533 against Multidrug-Resistant *Pseudomonas aeruginosa*. *Microbiol Resour Announc* 9.
- 534 29. Kwiatek M, Mizak L, Parasion S, Gryko R, Olender A, Niemcewicz M. 2015.  
535 Characterization of five newly isolated bacteriophages active against *Pseudomonas*  
536 *aeruginosa* clinical strains. *Folia Microbiol (Praha)* 60:7-14.
- 537 30. Latz S, Krüttgen A, Häfner H, Buhl EM, Ritter K, Horz HP. 2017. Differential Effect of  
538 Newly Isolated Phages Belonging to PB1-Like, phiKZ-Like and LUZ24-Like Viruses  
539 against Multi-Drug Resistant *Pseudomonas aeruginosa* under Varying Growth  
540 Conditions. *Viruses* 9.
- 541 31. Oliveira VC, Bim FL, Monteiro RM, Macedo AP, Santos ES, Silva-Lovato CH, Paranhos  
542 HFO, Melo LDR, Santos SB, Watanabe E. 2020. Identification and Characterization of  
543 New Bacteriophages to Control Multidrug-Resistant *Pseudomonas aeruginosa* Biofilm  
544 on Endotracheal Tubes. *Front Microbiol* 11:580779.
- 545 32. Bradley DE, Pitt TL. 1974. Pilus-dependence of four *Pseudomonas aeruginosa*  
546 bacteriophages with non-contractile tails. *J Gen Virol* 24:1-15.
- 547 33. Huszczyński SM, Lam JS, Khursigara CM. 2019. The Role of *Pseudomonas aeruginosa*  
548 Lipopolysaccharide in Bacterial Pathogenesis and Physiology. *Pathogens* 9.
- 549 34. Lamont IL, Beare PA, Ochsner U, Vasil AI, Vasil ML. 2002. Siderophore-mediated  
550 signaling regulates virulence factor production in *Pseudomonas aeruginosa*. *Proc Natl*  
551 *Acad Sci U S A* 99:7072-7.
- 552 35. Chan BK, Siström M, Wertz JE, Kortright KE, Narayan D, Turner PE. 2016. Phage  
553 selection restores antibiotic sensitivity in MDR *Pseudomonas aeruginosa*. *Sci Rep*  
554 6:26717.
- 555 36. Zemke AC, Kocak BR, Bomberger JM. 2017. Sodium Nitrite Inhibits Killing of  
556 *Pseudomonas aeruginosa* Biofilms by Ciprofloxacin. *Antimicrob Agents Chemother* 61.
- 557 37. Fong SA, Drilling A, Morales S, Cornet ME, Woodworth BA, Fokkens WJ, Psaltis AJ,  
558 Vreugde S, Wormald PJ. 2017. Activity of Bacteriophages in Removing Biofilms of  
559 *Pseudomonas aeruginosa* Isolates from Chronic Rhinosinusitis Patients. *Front Cell*  
560 *Infect Microbiol* 7:418.
- 561 38. Fu W, Forster T, Mayer O, Curtin JJ, Lehman SM, Donlan RM. 2010. Bacteriophage  
562 cocktail for the prevention of biofilm formation by *Pseudomonas aeruginosa* on catheters  
563 in an in vitro model system. *Antimicrob Agents Chemother* 54:397-404.
- 564 39. Hendricks MR, Lashua LP, Fischer DK, Flitter BA, Eichinger KM, Durbin JE, Sarkar SN,  
565 Coyne CB, Empey KM, Bomberger JM. 2016. Respiratory syncytial virus infection  
566 enhances *Pseudomonas aeruginosa* biofilm growth through dysregulation of nutritional  
567 immunity. *Proc Natl Acad Sci U S A* 113:1642-7.
- 568 40. Cornforth DM, Diggle FL, Melvin JA, Bomberger JM, Whiteley M. 2020. Quantitative  
569 Framework for Model Evaluation in Microbiology Research Using *Pseudomonas*  
570 *aeruginosa* and Cystic Fibrosis Infection as a Test Case. *mBio* 11.

- 571 41. Van Belleghem JD, Dabrowska K, Vaneechoutte M, Barr JJ, Bollyky PL. 2018.  
572 Interactions between Bacteriophage, Bacteria, and the Mammalian Immune System.  
573 Viruses 11.  
574

| Phage     | Source <sup>1</sup> | Host       | Length (bp) | %GC  | Predicted Family    | Predicted Genus       | NCBI Similar Phage (Accession) <sup>2</sup> | Coverage/Identity | BioSample    |
|-----------|---------------------|------------|-------------|------|---------------------|-----------------------|---------------------------------------------|-------------------|--------------|
| PSA04     | HWW                 | 418        | 48544       | 59.2 | <i>Siphoviridae</i> | -                     | JBD44 (NC_030929)                           | 68%/98%           | SAMN18741767 |
| PSA07/PB1 | ATCC                | ATCC 15692 | 65891       | 54.9 | <i>Myoviridae</i>   | <i>Pbunavirus</i>     | PB1 (NC_011810)                             | 100%/100%         | SAMN18741768 |
| PSA09     | HWW                 | 410        | 62015       | 55.5 | <i>Myoviridae</i>   | <i>Pbunavirus</i>     | Pa193 (NC_050148)                           | 99%/93%           | SAMN18741769 |
| PSA11     | HWW                 | ATCC 14210 | 48815       | 44.9 | <i>Podoviridae</i>  | -                     | PA11 (NC_007808)                            | 97%/99%           | SAMN18741770 |
| PSA13     | HWW                 | 427        | 45731       | 52.6 | <i>Podoviridae</i>  | <i>Bruynoghevirus</i> | Pa222 (MK837011)                            | 99%/93%           | SAMN18741771 |
| PSA16     | HWW                 | 466        | 45623       | 52.5 | <i>Podoviridae</i>  | <i>Bruynoghevirus</i> | Pa222 (MK837011)                            | 98%/98%           | SAMN18741772 |
| PSA20     | HWW                 | 639        | 62296       | 64.4 | <i>Siphoviridae</i> | <i>Yuavirus</i>       | AN14 (KX198613)                             | 95%/98%           | SAMN18741773 |
| PSA21     | HWW                 | 639        | 62243       | 64.5 | <i>Siphoviridae</i> | <i>Yuavirus</i>       | LKO4 (NC_041934)                            | 96%/97%           | SAMN18741774 |
| PSA25     | HWW                 | 426        | 64290       | 55.5 | <i>Myoviridae</i>   | <i>Pbunavirus</i>     | LBL3 (NC_011165)                            | 99%/95%           | SAMN18741775 |
| PSA28     | HWW                 | 428        | 48440       | 58.3 | <i>Siphoviridae</i> | -                     | PMBT28 (MG641885)                           | 96%/86%           | SAMN18741776 |
| PSA31     | HWW                 | 411        | 45505       | 52.5 | <i>Podoviridae</i>  | <i>Bruynoghevirus</i> | Pa222 (MK837011)                            | 98%/97%           | SAMN18741777 |
| PSA34     | HWW                 | 427        | 43749       | 52.3 | <i>Podoviridae</i>  | <i>Bruynoghevirus</i> | Pa222 (MK837011)                            | 98%/98%           | SAMN18741778 |
| PSA37     | HWW                 | 639        | 45506       | 52.5 | <i>Podoviridae</i>  | <i>Bruynoghevirus</i> | Pa222 (MK837011)                            | 98%/97%           | SAMN18741779 |
| PSA39     | HWW                 | 423        | 47030       | 64.2 | <i>Siphoviridae</i> | <i>Yuavirus</i>       | LKO4 (NC_041934)                            | 95%/98%           | SAMN18741780 |
| PSA40     | HWW                 | 466        | 45506       | 52.5 | <i>Podoviridae</i>  | <i>Bruynoghevirus</i> | Pa222 (MK837011)                            | 98%/97%           | SAMN18741781 |

575 **Table 1. Genome characteristics of *P. aeruginosa*-targeting bacteriophages.**

576 <sup>1</sup>HWW = Hospital wastewater; <sup>2</sup>Most similar phage based on BLAST to the NCBI nr database

577 **Table 2. Protein-altering mutations identified in phage-resistant *P. aeruginosa* mutants**

| Isolate             | Phage | Location <sup>1</sup> | Mutation       | Description                                  |
|---------------------|-------|-----------------------|----------------|----------------------------------------------|
| 639 $\phi$ R        | PSA20 | 3,133,682             | N401I          | Hypothetical protein                         |
|                     |       | 5,758,428             | T278P          | Type IV pilus protein PilB                   |
| 410 $\phi$ R        | PSA09 | 2,674,126             | V671A          | 16S rRNA endonuclease CdiA                   |
|                     |       | 2,688,288             | L5392F         | 16S rRNA endonuclease CdiA                   |
|                     |       | 5,582,688             | D279G          | RfaB-like glycosyltransferase                |
| 427 $\phi$ R        | PSA34 | 2,909,283             | E643G          | Linear gramicidin synthase subunit D IgrD    |
|                     |       | 5,953,386             | frameshift +TG | dTDP-4-dehydrorhamnose reductase RfbD        |
| ATCC 14210 $\phi$ R | PSA11 | 3,871,727             | D304S          | Cbb3-type cytochrome c oxidase subunit CcoN1 |
|                     |       | 4,104,560             | frameshift +A  | Transcriptional activator protein LasR       |

578 <sup>1</sup>Genome coordinates in parent *P. aeruginosa* genome.

579 **Figure Legends**

580 **Figure 1.** Diverse *P. aeruginosa* clinical isolates used for bacteriophage isolation and screening.

581 (A) Core genome phylogeny of 23 *P. aeruginosa* isolates used for phage isolation. Isolates were  
582 typed for biofilm formation (measured as crystal violet staining intensity), protease production,  
583 swimming motility, mucoidy, and prophage abundance. Black squares show the presence of  
584 binary phenotypes. (B) Clusters of similar prophages found in the genomes of different *P.*  
585 *aeruginosa* isolates. Bacterial isolate names are listed inside the nodes of each cluster, and  
586 lines connect prophages that share >90% sequence coverage and >90% sequence identity. (C)  
587 Prophage abundance in isolates that do (CRISPR+) or do not (CRISPR-) encode functional  
588 CRISPR-Cas systems. P-value is from a two-tailed *t*-test.

589 **Figure 2.** Genomic similarity among isolated *P. aeruginosa* bacteriophages and publicly  
590 available phage genomes. Phages are organized by family and genus, which are labeled at the  
591 top of the figure. Phage genomes were compared with one another using nucleotide BLAST to  
592 determine sequence coverage and nucleotide identity for each pairwise comparison. Coverage  
593 and identity values were multiplied to calculate the “sequence similarity” for each comparison.  
594 Similarity values range from 0-100%, and are shown with red shading (0% = white, 100% =  
595 red). Dendrograms at top were generated by Pearson correlation clustering of sequence  
596 similarity values across all pairwise comparisons.

597 **Figure 3.** Infectivity of isolated phages against genetically diverse *P. aeruginosa* isolates.  
598 Bacterial isolates are ordered according to the core genome phylogeny in Figure 1. Infectivity is  
599 shown as the log<sub>10</sub> titer (PFU/mL) of each phage against each isolate. Boxed white values  
600 indicate the *P. aeruginosa* isolate that each phage was isolated and propagated on. Blue  
601 shading corresponds to phage titer, with darker shading indicating higher titer. White shading  
602 indicates no phage activity.

603 **Figure 4.** Phenotypic consequences of phage resistance. (A) Twitching motility differences  
604 between isolate 639 and 639 $\Phi$ R, a phage-resistant mutant raised against phage PSA20 that



605 harbors a mutation in the Type IV pilus protein PilB. (B) Ceftazidime (CAZ) susceptibilities of  
606 two pairs of wild type parent isolates and corresponding phage-resistant mutants, both of which  
607 harbor mutations in genes impacting LPS biosynthesis. (C) Protease production differences  
608 between isolate ATCC 14210 and ATCC 14210 $\phi$ R, a phage-resistant mutant raised against  
609 phage PSA11 that harbors a mutation in the quorum-sensing transcriptional regulator LasR. (D)  
610 Pyoverdine production quantified in ATCC 14210 and ATCC 14210 $\phi$ R. P-value is from a two-  
611 tailed *t*-test.

612 **Figure 5.** Phage-mediated killing of *P. aeruginosa* grown in biofilms *in vitro* and *ex vivo*. (A)  
613 Bacterial viability measured after *P. aeruginosa* isolate 427 biofilms were grown *in vitro* and then  
614 treated with either fresh media (Untreated), or with phages PSA07/PB1 or PSA34. (B) Viability  
615 after phage PSA07/PB1 treatment of *P. aeruginosa* isolate 427 biofilms grown on human-  
616 derived CF airway epithelial cells. Viable bacteria were quantified as CFU/mL, and phage-  
617 treated conditions were compared to the untreated condition using two-tailed *t*-tests. \*\**P* < 0.01,  
618 \*\*\*\**P* < 0.0001.

619 **Figure S1.** Genome sequence alignment of similar *Bruynoghevirus* phages. The genomes of  
620 phages PSA31, PSA37, and PSA40 were aligned to one another using Mauve. Grey arrows  
621 indicate coding sequences, and pink arrowheads show the location of tRNA genes. Vertical  
622 black lines show differences in nucleotide sequence between phage genomes, and horizontal  
623 black lines show differences due to nucleotide insertions or deletions.

A

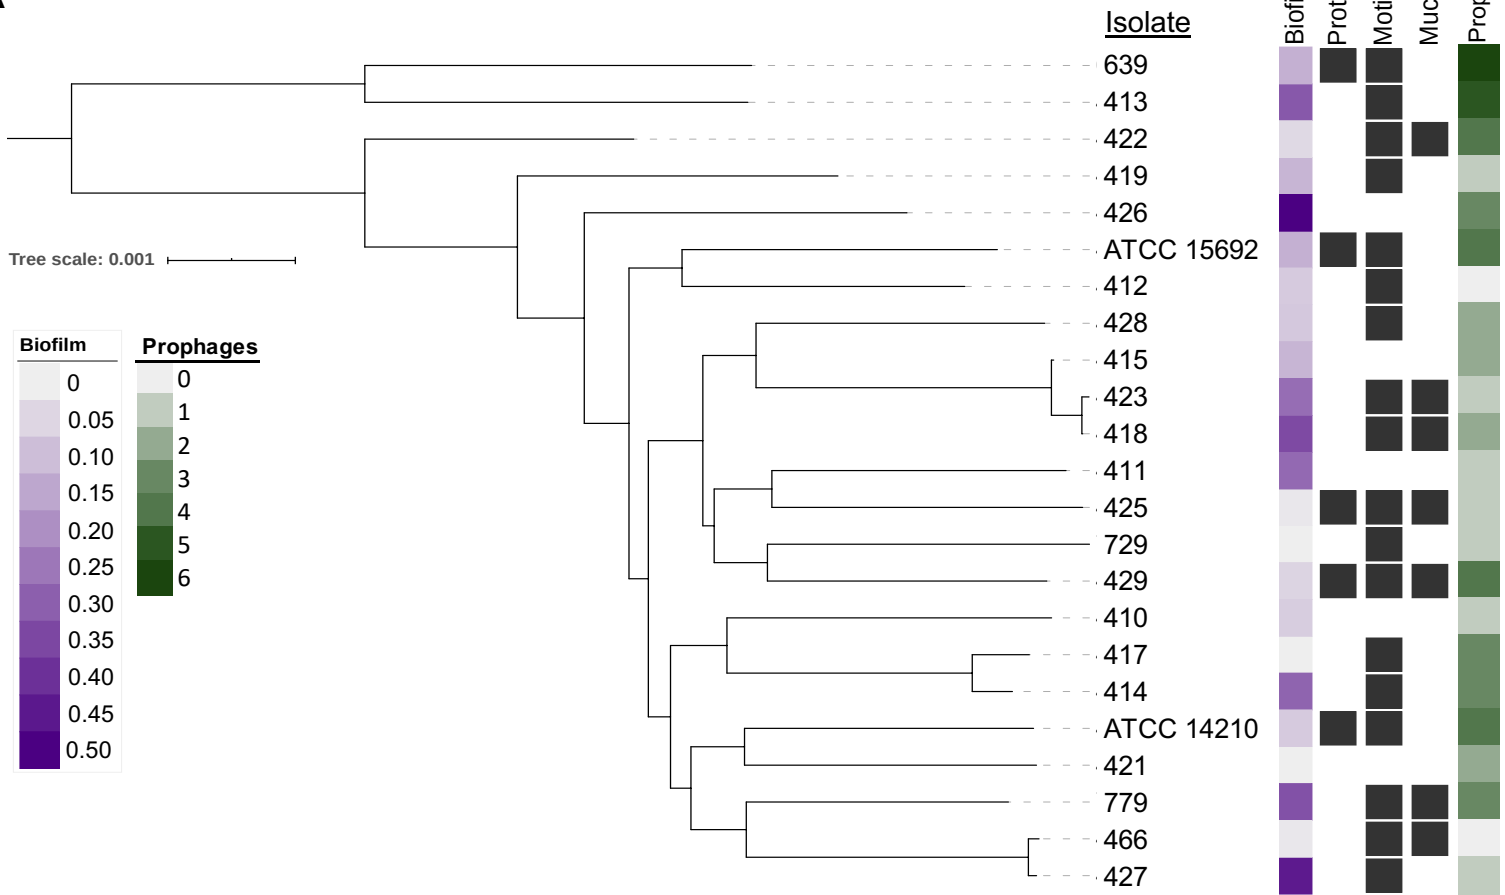

B

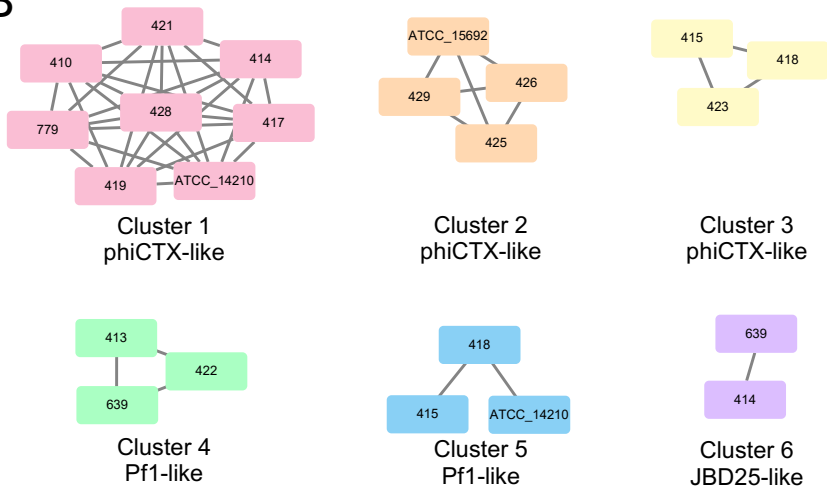

C

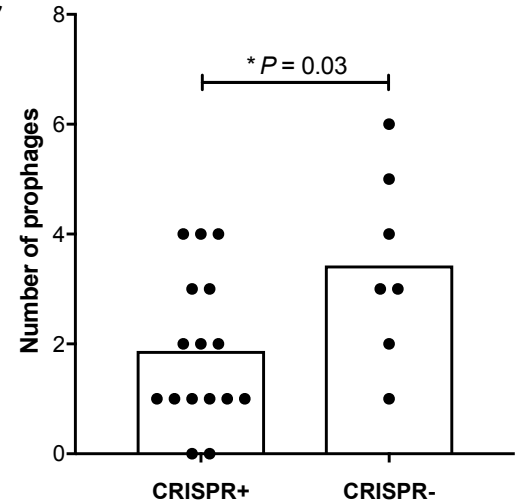

**Figure 1. Diverse *P. aeruginosa* clinical isolates used for bacteriophage isolation and screening.** (A) Core genome phylogeny of 23 *P. aeruginosa* isolates used for phage isolation. Isolates were typed for biofilm formation (measured as crystal violet staining intensity), protease production, swimming motility, mucoidy, and prophage abundance. Black squares show the presence of binary phenotypes. (B) Clusters of similar prophages found in the genomes of different *P. aeruginosa* isolates. Bacterial isolate names are listed inside the nodes of each cluster, and lines connect prophages that share >90% sequence coverage and >90% sequence identity. (C) Prophage abundance in isolates that do (CRISPR+) or do not (CRISPR-) encode functional CRISPR-Cas systems. P-value is from a two-tailed *t*-test.

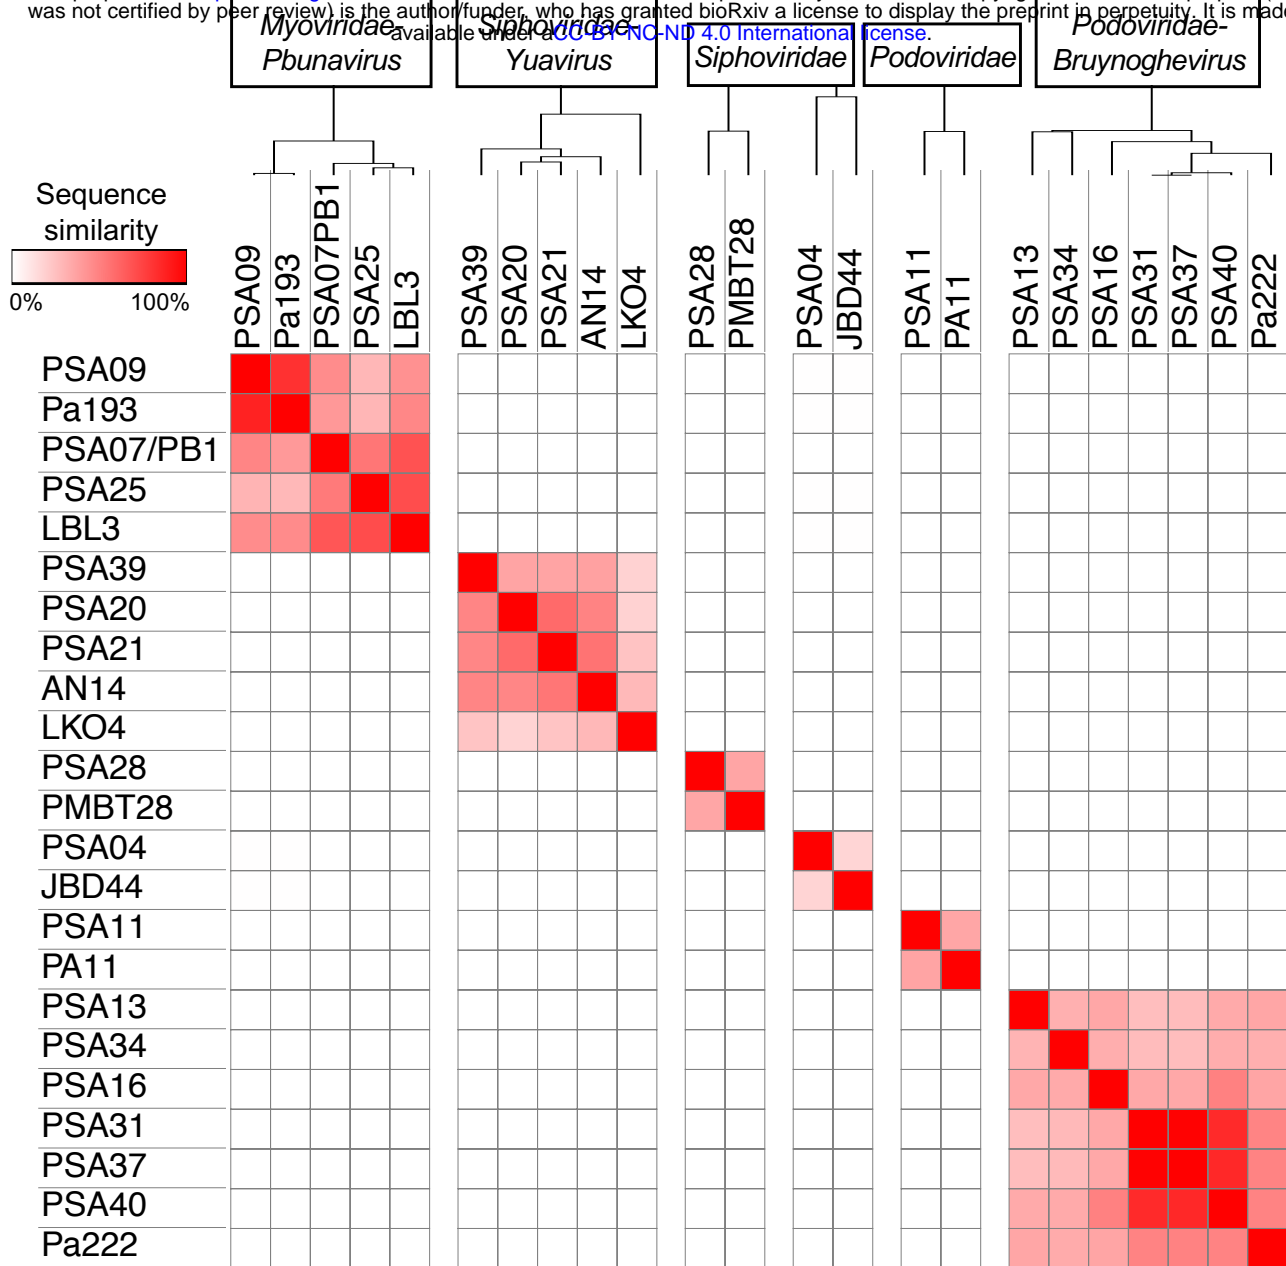

**Figure 2. Genomic similarity among isolated *P. aeruginosa* bacteriophages and publicly available phage genomes.** Phages are organized by family and genus, which are labeled at the top of the figure. Phage genomes were compared with one another using nucleotide BLAST to determine sequence coverage and nucleotide identity for each pairwise comparison. Coverage and identity values were multiplied to calculate the “sequence similarity” for each comparison. Similarity values range from 0-100%, and are shown with red shading (0% = white, 100% = red). Dendrograms at top were generated by Pearson correlation clustering of sequence similarity values across all pairwise comparisons.

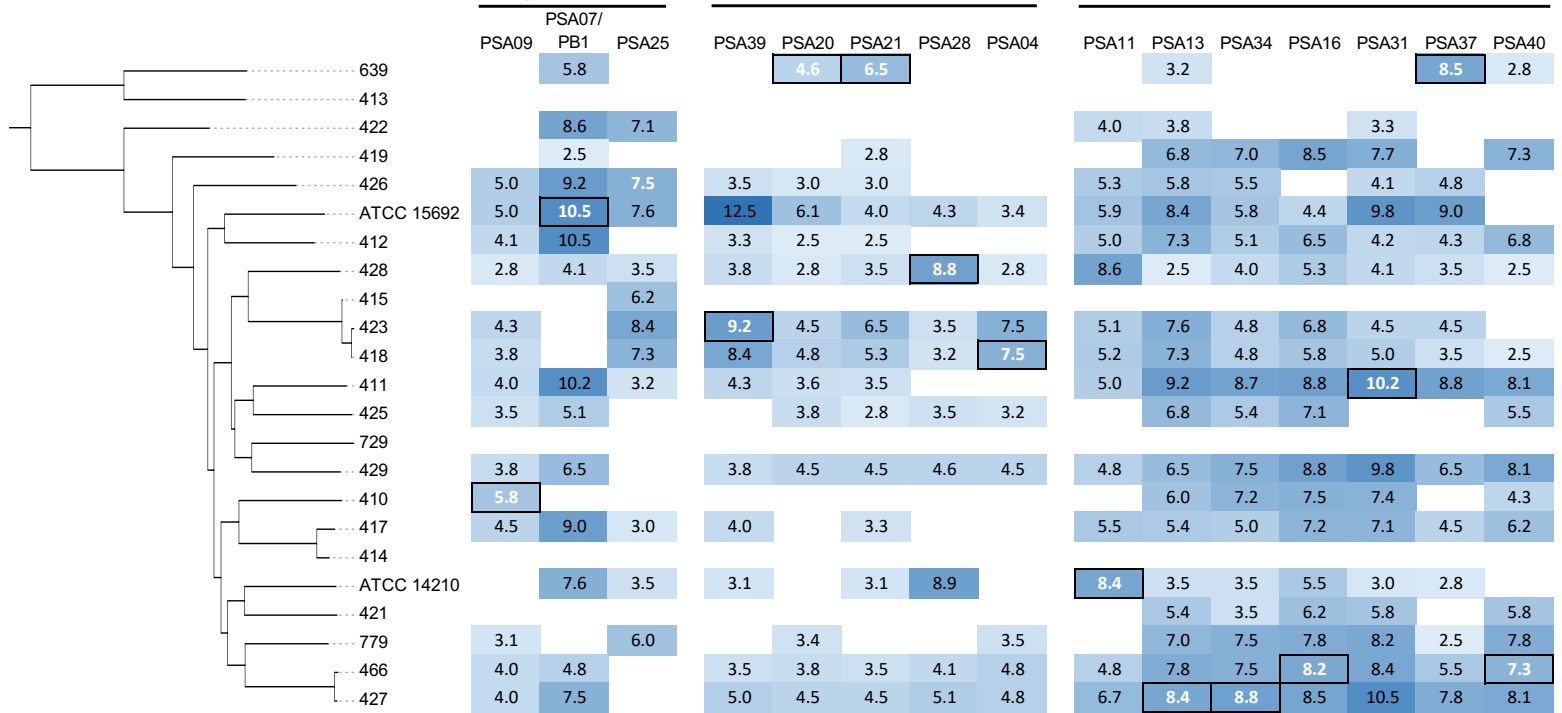

**Figure 3. Infectivity of isolated phages against genetically diverse *P. aeruginosa* isolates.** Bacterial isolates are ordered according to the core genome phylogeny in Figure 1. Infectivity is shown as the  $\log_{10}$  titer (PFU/mL) of each phage against each isolate. Boxed white values indicate the *P. aeruginosa* isolate that each phage was isolated and propagated on. Blue shading corresponds to phage titer, with darker shading indicating higher titer. White shading indicates no phage activity.

A

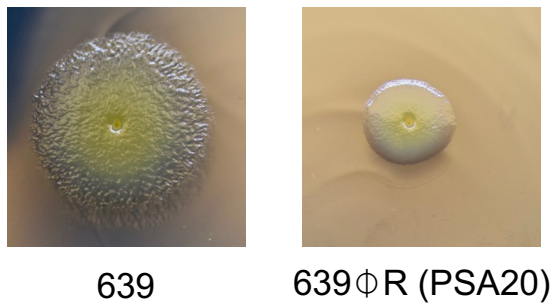

C

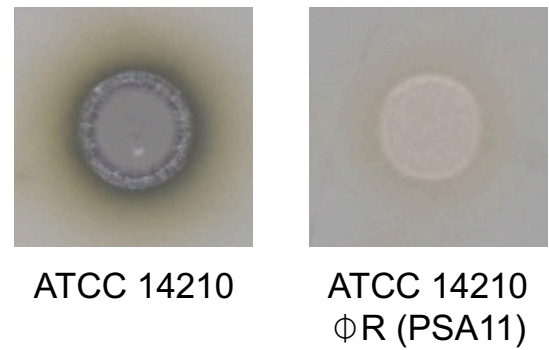

B

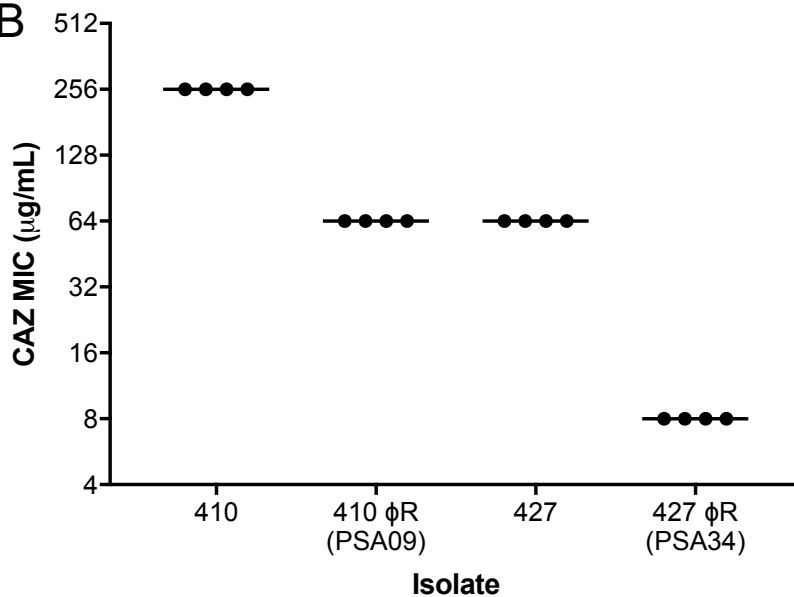

D

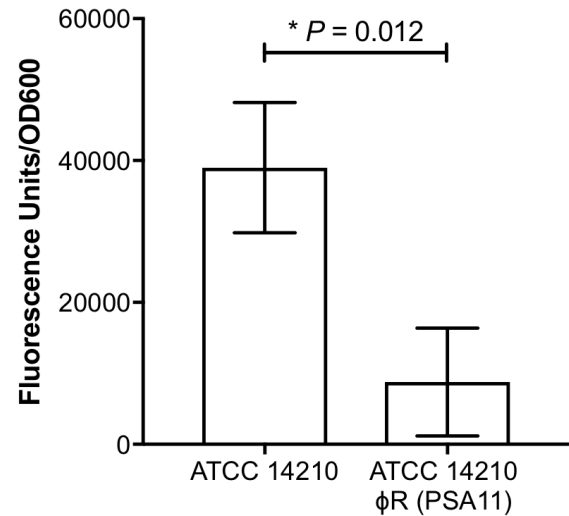

**Figure 4.** Phenotypic consequences of phage resistance. (A) Twitching motility differences between isolate 639 and 639 $\phi$ R, a phage-resistant mutant raised against phage PSA20 that harbors a mutation in the Type IV pilus protein PilB. (B) Ceftazidime (CAZ) susceptibilities of two pairs of wild type parent isolates and corresponding phage-resistant mutants, both of which harbor mutations in genes impacting LPS biosynthesis. (C) Protease production differences between isolate ATCC 14210 and ATCC 14210 $\phi$ R, a phage-resistant mutant raised against phage PSA11 that harbors a mutation in the quorum-sensing transcriptional regulator LasR. (D) Pyoverdine production quantified in ATCC 14210 and ATCC 14210 $\phi$ R. P-value is from a two-tailed *t*-test.

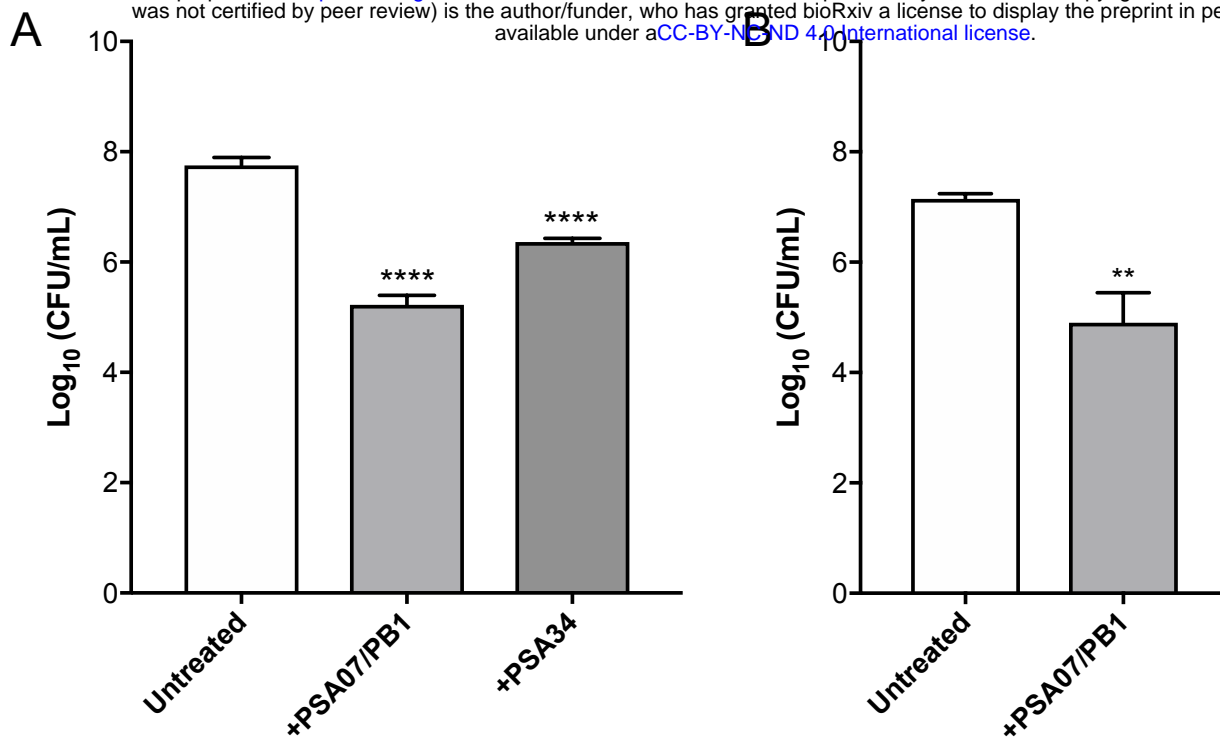

**Figure 5.** Phage-mediated killing of *P. aeruginosa* grown in biofilms *in vitro* and *ex vivo*. (A) Bacterial viability measured after *P. aeruginosa* isolate 427 biofilms were grown *in vitro* and then treated with either fresh media (Untreated), or with phages PSA07/PB1 or PSA34. (B) Viability after phage PSA07/PB1 treatment of *P. aeruginosa* isolate 427 biofilms grown on human-derived CF airway epithelial cells. Viable bacteria were quantified as CFU/mL, and phage-treated conditions were compared to the untreated condition using two-tailed *t*-tests. \*\**P* < 0.01, \*\*\*\**P* < 0.0001.

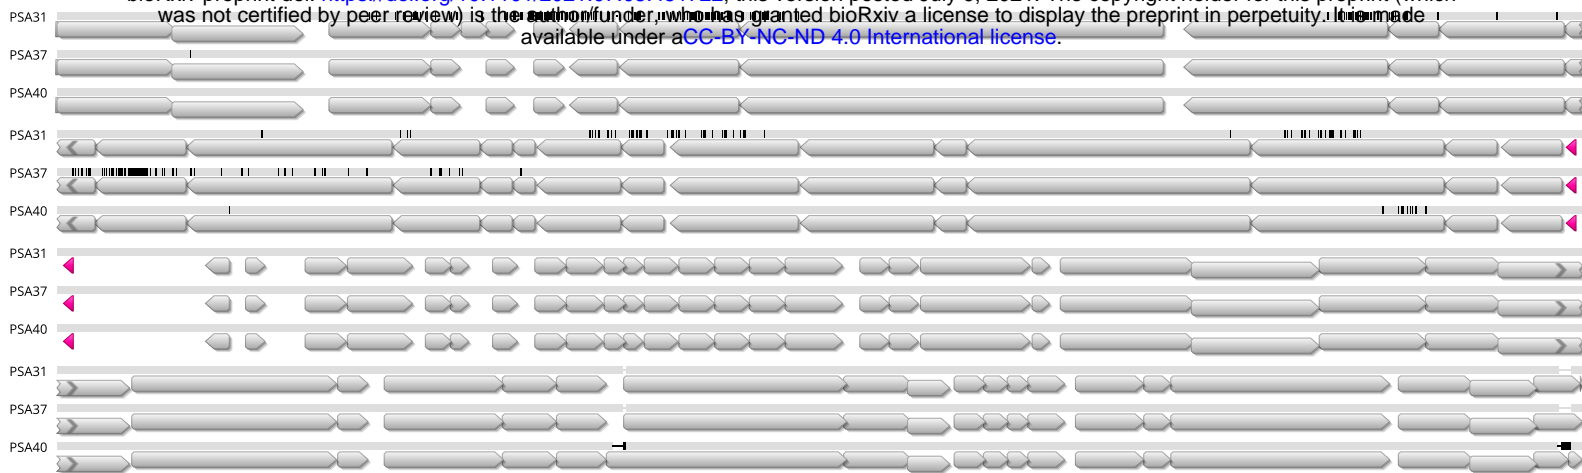

**Figure S1. Genome sequence alignment of similar *Bruynoghevirus* phages.** The genomes of phages PSA31, PSA37, and PSA40 were aligned to one another using Mauve. Grey arrows indicate coding sequences, and pink arrowheads show the location of tRNA genes. Vertical black lines show differences in nucleotide sequence between phage genomes, and horizontal black lines show differences due to nucleotide insertions or deletions.
